# Supplementary material for: Experimental and theoretical evaluation on the conformational behavior of l-aspartic acid dimethyl ester and its N-acetylated derivative
Source: Royal Society of Chemistry journal article supplement (doi:10.1039/c4ra14480e), 2015-01-01
Supplement: c4ra14480e1.pdf [file c4ra14480e1.pdf]

## Electronic Supplementary Information

### Experimental and theoretical evaluation on the conformational behavior of L-aspartic acid dimethyl ester and its *N*-acetylated derivative

C. B. Braga,<sup>a</sup> L. C. Ducati<sup>b</sup> and R. Rittner<sup>a</sup>

<sup>a</sup>*Physical Organic Chemistry Laboratory, Chemistry Institute, University of Campinas, P.O.  
Box 6154, 13083-970, Campinas, SP, Brazil*

<sup>b</sup>*Chemistry Institute, University of Sao Paulo, 05508-900, São Paulo, SP, Brazil*

## Synthesis of the compounds

### 1. L-Aspartic acid dimethyl ester

Activated zinc powder (100.0 mg) was added over a suspension of L-aspartic acid dimethyl ester hydrochloride (197.6 mg, 1.0 mmol), commercially available from Aldrich, in 10 mL of dichloromethane. The reaction mixture was stirred for 3 h at room temperature until deprotonation of the salt. Then, the excess zinc was filtered off and the solvent was removed through evaporation *in vacuo*. Thus, AspOMe was obtained as a white crystalline solid (142.4 mg, 0.9 mmol, 88.4% yield), which was used without further purification. IR (KBr):  $\nu = 3306$  (m), 3248 (m), 2958 (m), 2856 (w), 1736 (s), 1586 (m), 1441 (s), 1376 (m), 1244 (s), 1214 (s)  $\text{cm}^{-1}$ .  $^1\text{H}$  NMR (600.17 MHz, DMSO- $d_6$ , 25 °C, TMS):  $\delta$  (ppm) = 3.80 (t,  $^3J = 6.3$  Hz, 1H), 3.64 (s, 3H), 3.60 (s, 3H), 2.73 (dd,  $^3J = 6.3$  and  $^2J = 16.3$  Hz, 1H), 2.68 (dd,  $^3J = 6.3$  and  $^2J = 16.3$  Hz, 1H).  $^{13}\text{C}$  NMR (150.91 MHz, DMSO- $d_6$ , 25 °C, TMS):  $\delta$  (ppm) = 173.49, 171.25, 52.58, 52.10, 50.85, 37.92. MS (TOF-EI+): calcd for  $\text{C}_6\text{H}_{11}\text{NO}_4$ , 161.0688; found 102.0561 (corresponding to loss of  $\text{CH}_3\text{O-C=O}$ ).

### 2. N-Acetyl-L-aspartic acid dimethyl ester

Anhydrous methanol (10 mL) was added to a 25 mL round-bottomed flask and cooled to -5 °C. Thionyl chloride (0.8 mL, 11.4 mmol) was slowly added dropwise with stirring, and the solution was maintained an additional 10 min at -5 °C. Thereafter, 1.0 g (5.7 mmol) of *N*-acetyl-L-aspartic acid was added in small portions, and the reaction mixture was stirred at that temperature for 3 h and then at room temperature for 15 h. The solution was concentrated under reduced pressure and the resulting residue was dissolved in 5 mL of water and 5 mL of dichloromethane. Saturated solution of  $\text{KHCO}_3$  was added until pH 8 was reached. Aqueous phase was extracted with dichloromethane (3 x 5 mL), the organic extracts were combined, dried with anhydrous  $\text{MgSO}_4$ , filtered, and the solvent was removed with a rotary evaporator to give 801.9 mg of *N*-acetyl-L-aspartic acid dimethyl ester hydrochloride (3.3 mmol, 58.6% yield), which was used without purification. In the next step, the crystalline salt was suspended in 5 mL of chloroform, 0.5 mL of triethylamine was added at room temperature, and the mixture

was stirred for 4 h. The residue was dissolved in 5 mL of water and saturated solution of  $\text{NaHCO}_3$  (to raise the pH until 8), and the aqueous phase was extracted with chloroform (3 x 5 mL). The organic layer was dried ( $\text{Na}_2\text{SO}_4$ ), filtered, and the solvent was removed *in vacuo* to yield 551.0 mg (2.7 mmol, 80.9% yield) of *N*-acetyl-L-aspartic acid dimethyl ester as white crystals. IR (KBr):  $\nu = 3322$  (s), 2958 (m), 2849 (w), 1739 (s), 1651 (s), 1537 (s), 1437 (s), 1375 (s), 1213 (s)  $\text{cm}^{-1}$ .  $^1\text{H}$  NMR (600.17 MHz,  $\text{DMSO-}d_6$ , 25 °C, TMS):  $\delta$  (ppm) = 8.37 (d,  $^3J = 7.8$  Hz, 1H), 4.61 (ddd,  $^3J = 6.0, 7.3$  and  $7.8$  Hz, 1H), 3.62 (s, 3H), 3.61 (s, 3H), 2.78 (dd,  $^3J = 6.0$  and  $^2J = 16.4$  Hz, 1H), 2.69 (dd,  $^3J = 7.3$  and  $^2J = 16.4$  Hz, 1H), 1.83 (s, 3H).  $^{13}\text{C}$  NMR (150.91 MHz,  $\text{DMSO-}d_6$ , 25 °C, TMS):  $\delta$  (ppm) = 171.75, 170.91, 169.72, 52.60, 52.15, 48.94, 36.11, 22.72. MS (TOF-EI+): calcd for  $\text{C}_8\text{H}_{13}\text{NO}_5$ , 203.0794; found 144.0639 (corresponding to loss of  $\text{CH}_3\text{O-C=O}$ ).

---

### AspOMe-I

---

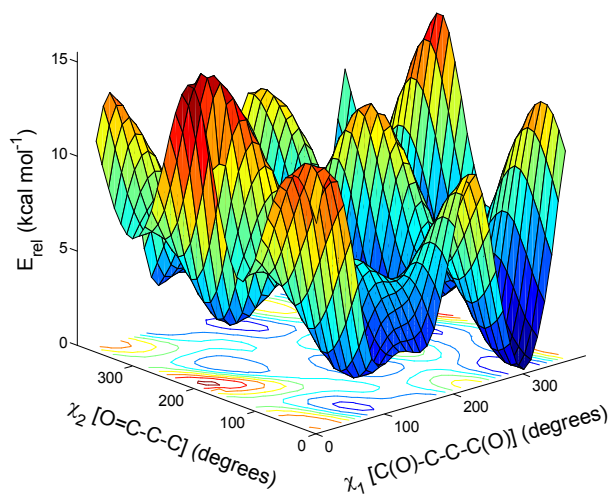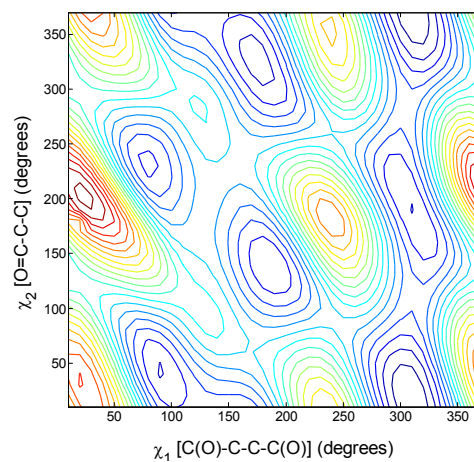

---

### AspOMe -III

---

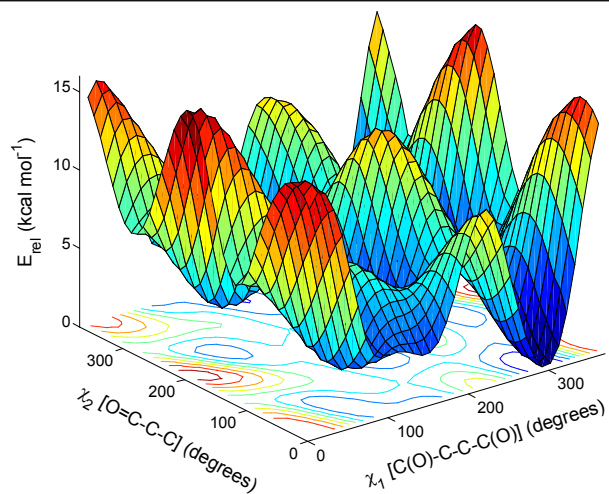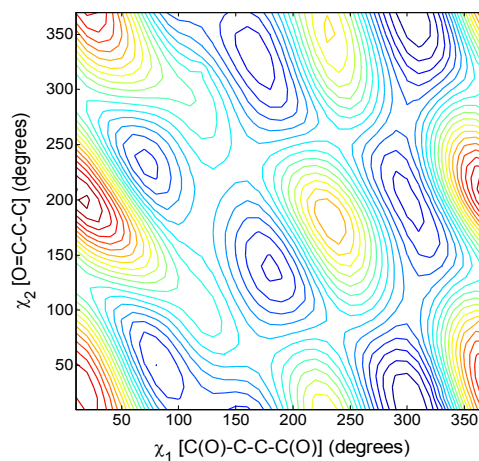

---

### AspOMe -IV1

---

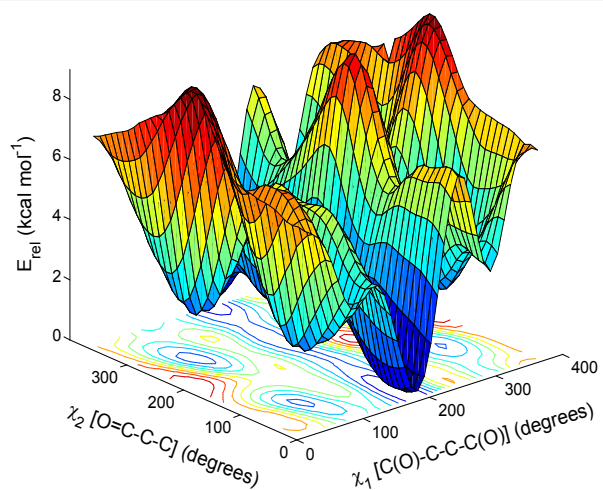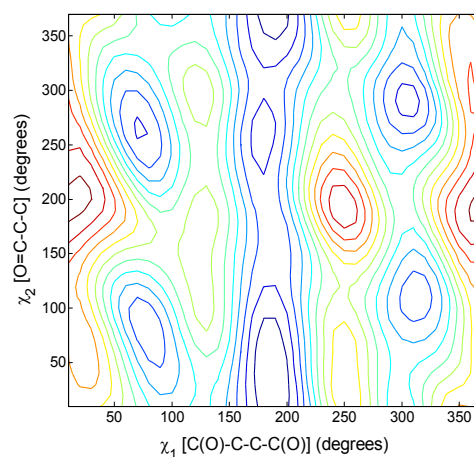

---

### AspOMe -IV2

---

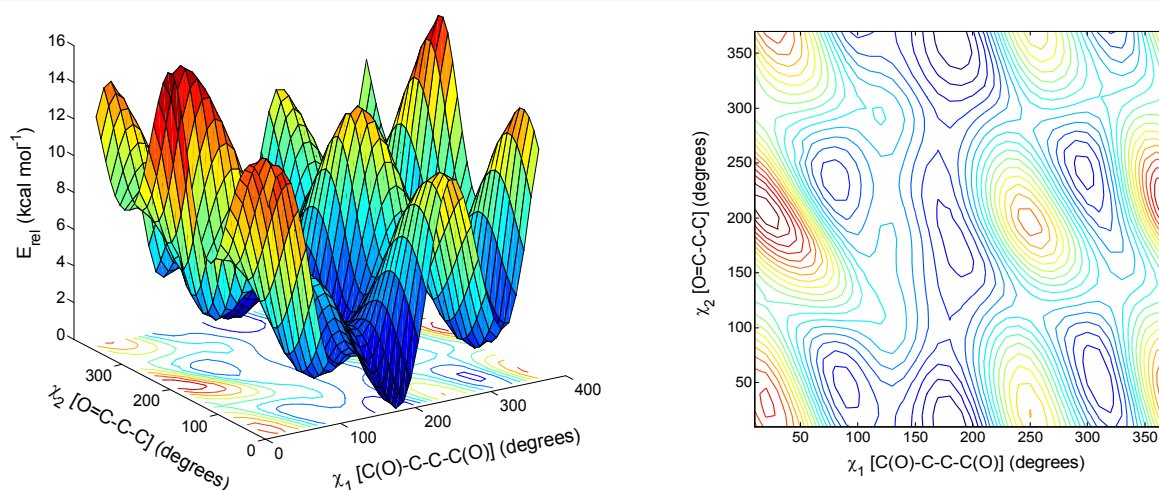

---

### AspOMe -V1

---

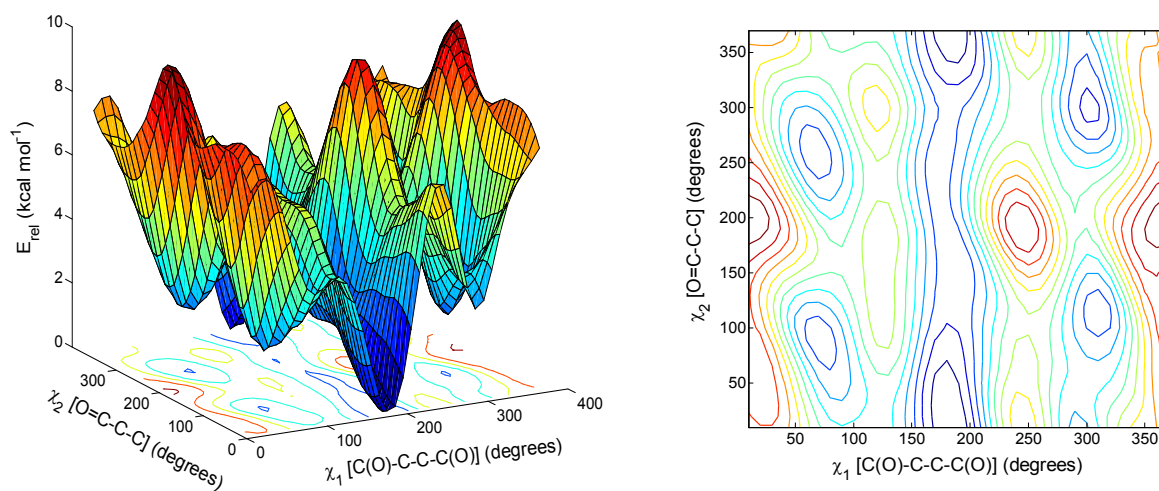

---

### AspOMe -V2

---

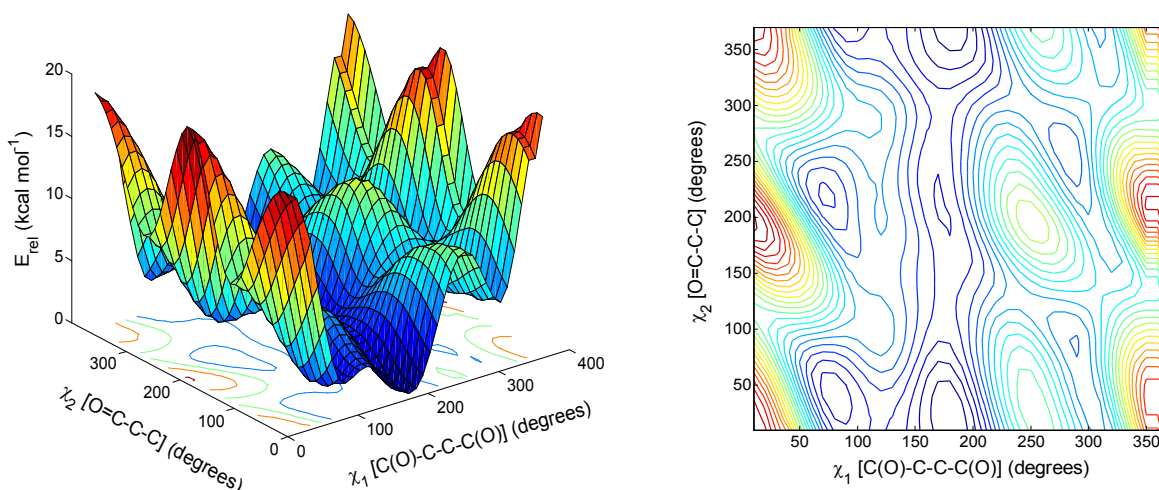

**Fig. S1.** Potential energy surfaces (PES, at the left) built by varying the  $\chi_1$  [C(O)-C-C-C(O)] and  $\chi_2$  [O=C-C-C] dihedral angles for AspOMe, calculated at the B3LYP/cc-pVDZ level for the isolated molecule, and their corresponding contour maps (at the right) as a function of the  $\chi_1$  and  $\chi_2$  dihedral angles.

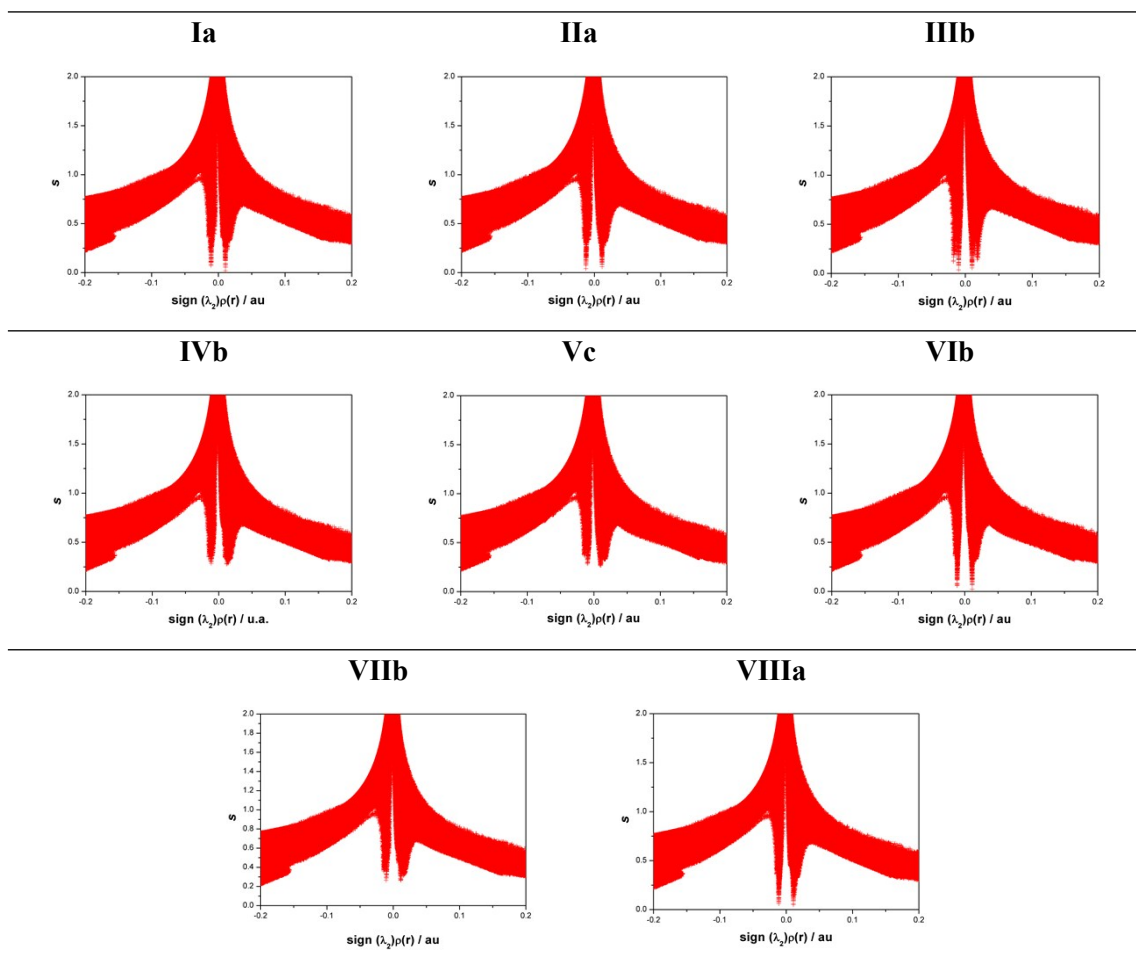

**Fig. S2.** NCI plots of the reduced density gradients  $[s(r)]$  versus  $\text{sign}(\lambda_2)\rho(r)$  for the AspOMe conformers.

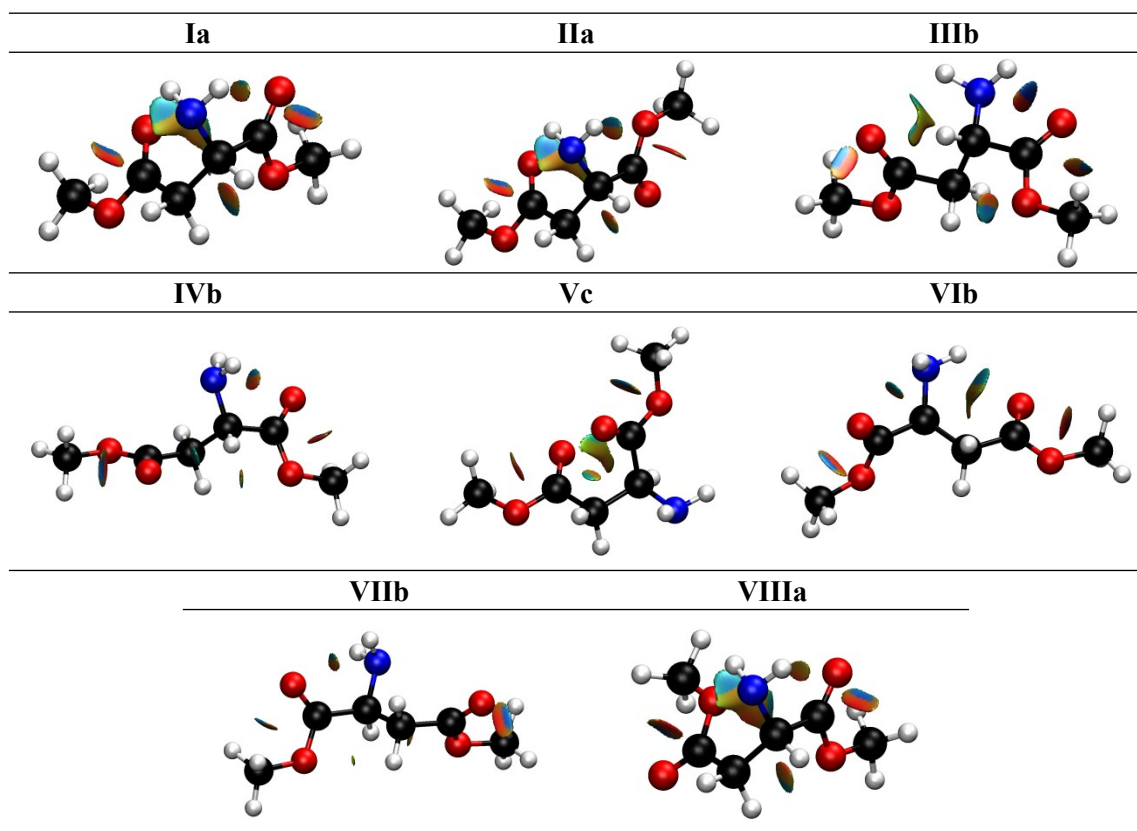

**Fig. S3.** NCI isosurfaces of AspOME conformers, which were generated with  $s = 0.5$  au and blue-green-red scaling from  $-2 \text{ au} < (\lambda_2)\rho(r) < 2 \text{ au}$ .

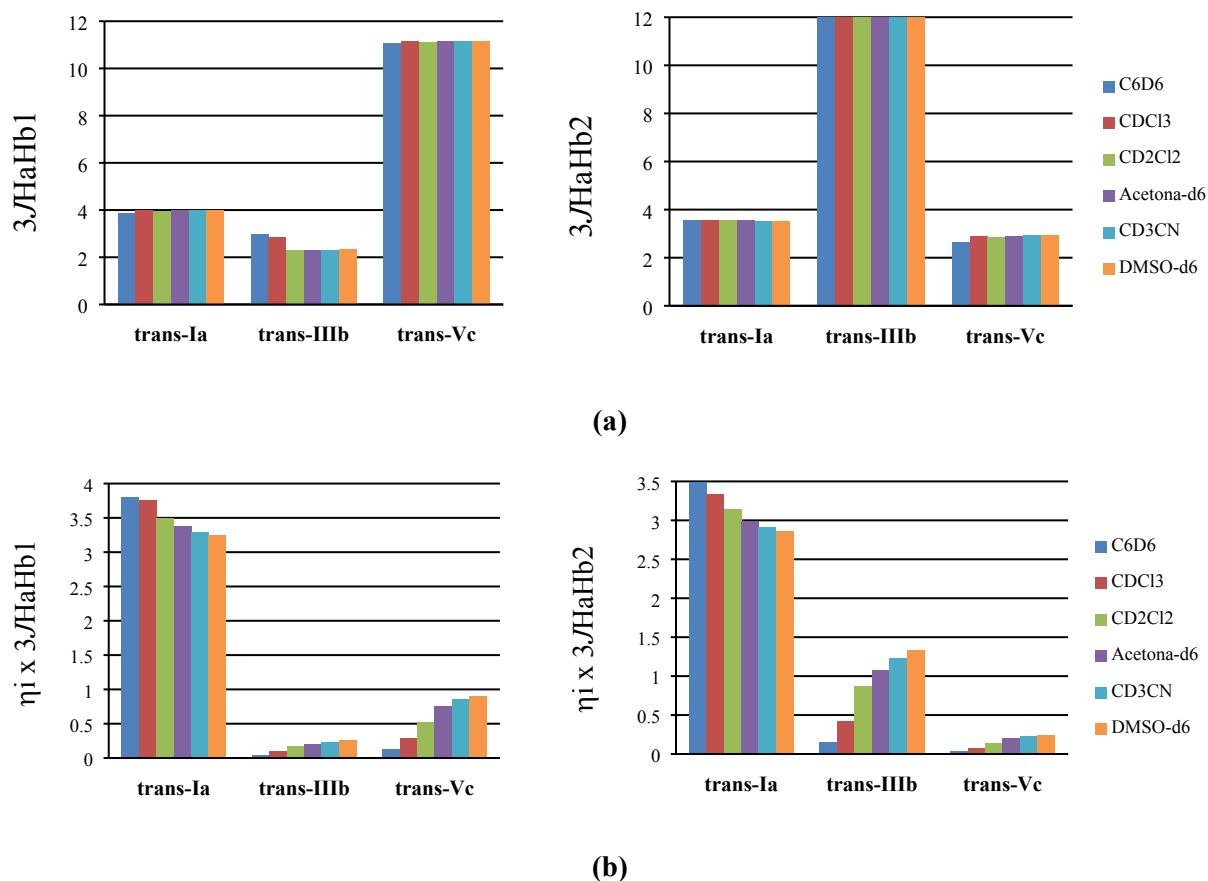

**Fig. S4.** (a) Individual coupling constants  $^3J_{\text{HaHb},i}$  for the AcAspOME conformers and (b) conformational contributions ( $\eta_i \times ^3J_{\text{HaHb},i}$ ) for the observed  $^3J_{\text{HaHb},\text{obs}}$  coupling constants, calculated at the  $\omega$ B97X-D/EPR-III level of theory, by using the IEF-PCM in several solvents. The values are presented in Hz.



**Table S1.** Conformer energies, relative energies, populations, investigated dihedral angles<sup>a</sup> and dipole moments in isolated phase for the most stable conformers of AspOMe, optimized using different methods. In all cases the aug-cc-pVTZ basis set was used.<sup>(\*)</sup>

| Conformer      | Parameters                                              | MP2        | B3LYP      | CAM-B3LYP  | M05-2X     | M06-2X     | B97-D      | $\omega$ B97X-D |
|----------------|---------------------------------------------------------|------------|------------|------------|------------|------------|------------|-----------------|
| <b>Ia</b>      | $E$ (hartrees)                                          | -589.93943 | -591.16201 | -590.91311 | -591.09986 | -590.92884 | -590.78160 | -590.97001      |
|                | $E_{\text{rel}}$ (kcal mol <sup>-1</sup> ) <sup>b</sup> | 0.00       | 0.00       | 0.09       | 0.00       | 0.00       | 0.00       | 0.00            |
|                | ZPE (hartrees)                                          | --         | 0.17869    | 0.180973   | 0.182885   | 0.181463   | 0.174122   | 0.181599        |
|                | $E + \text{ZPE}$ (hartrees)                             | --         | -590.98332 | -590.73214 | -590.91697 | -590.74738 | -590.60747 | -590.78841      |
|                | $E_{\text{rel}} + \text{ZPE}$ (kcal mol <sup>-1</sup> ) | --         | 0.00       | 0.26       | 0.03       | 0.00       | 0.00       | 0.00            |
|                | %P ( $E_{\text{rel}} + \text{ZPE}$ )                    | --         | 20.8       | 20.8       | 32.5       | 44.7       | 29.9       | 30.4            |
|                | $\omega$ [O=C <sub>1</sub> -O-C]                        | 2.6        | 1.2        | 1.4        | 2.5        | 2.3        | 1.9        | 1.7             |
|                | $\psi$ [N-C-C=O]                                        | 21.3       | 19.6       | 20.8       | 21.3       | 21.3       | 19.3       | 21.2            |
|                | $\chi_1$ [C(O)-C-C-C(O)]                                | 57.1       | 62.6       | 61.7       | 58.5       | 58.1       | 60.0       | 60.1            |
|                | $\chi_2$ [O=C <sub>16</sub> -C-C]                       | 0.5        | 2.2        | 2.3        | 2.1        | 2.5        | 0.5        | 0.1             |
| $\mu$ (debyes) | 3.29                                                    | 3.13       | 3.16       | 3.19       | 3.06       | 3.09       | 3.19       |                 |
| <b>IIa</b>     | $E$ (hartrees)                                          | -589.93901 | -591.16185 | -590.91309 | -591.09979 | -590.92863 | -590.78112 | -590.96977      |
|                | $E_{\text{rel}}$ (kcal mol <sup>-1</sup> )              | 0.26       | 0.10       | 0.11       | 0.04       | 0.13       | 0.30       | 0.15            |
|                | ZPE (hartrees)                                          | --         | 0.178732   | 0.181037   | 0.182772   | 0.181743   | 0.174066   | 0.181481        |
|                | $E + \text{ZPE}$ (hartrees)                             | --         | -590.98311 | -590.73205 | -590.91702 | -590.74689 | -590.60706 | -590.78829      |
|                | $E_{\text{rel}} + \text{ZPE}$ (kcal mol <sup>-1</sup> ) | --         | 0.13       | 0.31       | 0.00       | 0.31       | 0.26       | 0.01            |
|                | %P ( $E_{\text{rel}} + \text{ZPE}$ )                    | --         | 16.7       | 19.1       | 34.0       | 26.5       | 19.3       | 26.8            |
|                | $\omega$ [O=C <sub>1</sub> -O-C]                        | 2.6        | 1.6        | 1.8        | 2.7        | 2.5        | 2.1        | 1.8             |
|                | $\psi$ [N-C-C=O]                                        | 161.4      | 161.1      | 160.2      | 161.9      | 162.5      | 164.2      | 161.1           |
|                | $\chi_1$ [C(O)-C-C-C(O)]                                | 61.8       | 66.2       | 65.4       | 62.5       | 63.2       | 64.8       | 64.8            |
|                | $\chi_2$ [O=C <sub>16</sub> -C-C]                       | 1.6        | 1.1        | 0.6        | 0.9        | 3.8        | 0.7        | 1.5             |
| $\mu$ (debyes) | 0.52                                                    | 0.40       | 0.40       | 0.48       | 0.52       | 0.47       | 0.41       |                 |

|                |                                                         |            |            |            |            |            |            |            |
|----------------|---------------------------------------------------------|------------|------------|------------|------------|------------|------------|------------|
| <b>IIIb</b>    | $E$ (hartrees)                                          | -589.93797 | -591.16221 | -590.91326 | -591.09879 | -590.92765 | -590.77994 | -590.96901 |
|                | $E_{\text{rel}}$ (kcal mol <sup>-1</sup> )              | 0.92       | 0.13       | 0.00       | 0.67       | 0.75       | 1.04       | 0.63       |
|                | ZPE (hartrees)                                          | --         | 0.178359   | 0.180711   | 0.182545   | 0.181279   | 0.173760   | 0.181306   |
|                | $E + \text{ZPE}$ (hartrees)                             | --         | -590.98385 | -590.73255 | -590.91625 | -590.74637 | -590.60618 | -590.78770 |
|                | $E_{\text{rel}} + \text{ZPE}$ (kcal mol <sup>-1</sup> ) | --         | 0.33       | 0.00       | 0.48       | 0.64       | 0.81       | 0.44       |
|                | %P ( $E_{\text{rel}} + \text{ZPE}$ )                    | --         | 11.9       | 32.3       | 15.1       | 15.2       | 7.6        | 14.4       |
|                | $\omega$ [O=C <sub>1</sub> -O-C]                        | 0.8        | 0.8        | 0.8        | 0.7        | 0.8        | 0.3        | 0.5        |
|                | $\psi$ [N-C-C=O]                                        | 17.2       | 15.3       | 15.9       | 16.0       | 16.4       | 13.5       | 16.5       |
|                | $\chi_1$ [C(O)-C-C-C(O)]                                | 177.3      | 173.0      | 173.7      | 175.3      | 175.7      | 172.4      | 175.2      |
|                | $\chi_2$ [O=C <sub>16</sub> -C-C]                       | 16.6       | 11.9       | 10.9       | 13.6       | 11.1       | 12.5       | 14.4       |
| $\mu$ (debyes) | 2.84                                                    | 2.81       | 2.86       | 2.81       | 2.79       | 2.76       | 2.79       |            |
| <b>IVb</b>     | $E$ (hartrees)                                          | -589.93705 | -591.16160 | -590.91202 | -591.09740 | -590.92591 | -590.78045 | -590.96825 |
|                | $E_{\text{rel}}$ (kcal mol <sup>-1</sup> )              | 1.50       | 0.26       | 0.78       | 1.54       | 1.84       | 0.72       | 1.10       |
|                | ZPE (hartrees)                                          | --         | 0.178386   | 0.180621   | 0.182356   | 0.181337   | 0.173849   | 0.181059   |
|                | $E + \text{ZPE}$ (hartrees)                             | --         | -590.98321 | -590.73140 | -590.91504 | -590.74457 | -590.60660 | -590.78719 |
|                | $E_{\text{rel}} + \text{ZPE}$ (kcal mol <sup>-1</sup> ) | --         | 0.07       | 0.72       | 1.24       | 1.76       | 0.55       | 0.76       |
|                | %P ( $E_{\text{rel}} + \text{ZPE}$ )                    | --         | 18.6       | 9.6        | 4.2        | 2.3        | 11.8       | 8.4        |
|                | $\omega$ [O=C <sub>1</sub> -O-C]                        | 1.1        | 0.8        | 0.5        | 0.5        | 0.5        | 1.1        | 0.2        |
|                | $\psi$ [N-C-C=O]                                        | 22.0       | 18.0       | 15.3       | 14.4       | 14.3       | 21.6       | 13.6       |
|                | $\chi_1$ [C(O)-C-C-C(O)]                                | 174.1      | 166.8      | 166.8      | 170.1      | 169.9      | 170.4      | 166.5      |
|                | $\chi_2$ [O=C <sub>16</sub> -C-C]                       | 53.7       | 42.4       | 40.5       | 45.4       | 45.9       | 53.5       | 44.2       |
| $\mu$ (debyes) | 1.53                                                    | 1.63       | 1.72       | 1.66       | 1.62       | 1.36       | 1.69       |            |
| <b>Vc</b>      | $E$ (hartrees)                                          | -589.93744 | -591.16147 | -590.91194 | -591.09790 | -590.92656 | -590.78071 | -590.96852 |
|                | $E_{\text{rel}}$ (kcal mol <sup>-1</sup> )              | 1.25       | 0.34       | 0.83       | 1.23       | 1.43       | 0.55       | 0.93       |
|                | ZPE (hartrees)                                          | --         | 0.178417   | 0.180690   | 0.182466   | 0.181382   | 0.173789   | 0.181400   |
|                | $E + \text{ZPE}$ (hartrees)                             | --         | -590.98305 | -590.73125 | -590.91543 | -590.74518 | -590.60692 | -590.78712 |
|                | $E_{\text{rel}} + \text{ZPE}$ (kcal mol <sup>-1</sup> ) | --         | 0.17       | 0.82       | 1.00       | 1.38       | 0.35       | 0.80       |
|                | %P ( $E_{\text{rel}} + \text{ZPE}$ )                    | --         | 15.7       | 8.1        | 6.3        | 4.3        | 16.6       | 7.8        |
|                | $\omega$ [O=C <sub>1</sub> -O-C]                        | 1.9        | 1.0        | 1.3        | 2.1        | 2.1        | 1.2        | 2.0        |
|                | $\psi$ [N-C-C=O]                                        | 85.7       | 87.6       | 89.1       | 86.8       | 87.3       | 84.4       | 85.9       |
|                | $\chi_1$ [C(O)-C-C-C(O)]                                | 60.0       | 65.4       | 64.0       | 61.6       | 60.9       | 65.0       | 62.8       |
|                | $\chi_2$ [O=C <sub>16</sub> -C-C]                       | 4.8        | 4.0        | 4.0        | 3.5        | 3.3        | 3.3        | 3.8        |
| $\mu$ (debyes) | 0.45                                                    | 0.49       | 0.48       | 0.36       | 0.37       | 0.39       | 0.39       |            |

|                |                                                         |            |            |            |            |            |            |            |
|----------------|---------------------------------------------------------|------------|------------|------------|------------|------------|------------|------------|
| <b>VIb</b>     | $E$ (hartrees)                                          | -589.93646 | -591.16086 | -590.91154 | -591.09714 | -590.92595 | -590.77984 | -590.96782 |
|                | $E_{\text{rel}}$ (kcal mol <sup>-1</sup> )              | 1.87       | 0.72       | 1.08       | 1.71       | 1.82       | 1.10       | 1.37       |
|                | ZPE (hartrees)                                          | --         | 0.178333   | 0.180602   | 0.182143   | 0.181136   | 0.173905   | 0.181036   |
|                | $E + \text{ZPE}$ (hartrees)                             | --         | -590.98253 | -590.73093 | -590.91499 | -590.74481 | -590.60593 | -590.78678 |
|                | $E_{\text{rel}} + \text{ZPE}$ (kcal mol <sup>-1</sup> ) | --         | 0.50       | 1.02       | 1.24       | 1.61       | 0.97       | 1.02       |
|                | %P ( $E_{\text{rel}} + \text{ZPE}$ )                    | --         | 8.9        | 5.8        | 4.2        | 2.9        | 5.9        | 5.5        |
|                | $\omega$ [O=C <sub>1</sub> -O-C]                        | 0.6        | 0.4        | 0.3        | 0.3        | 0.2        | 0.7        | 0.9        |
|                | $\psi$ [N-C-C=O]                                        | 36.3       | 34.6       | 32.2       | 31.6       | 29.4       | 36.1       | 35.0       |
|                | $\chi_1$ [C(O)-C-C-C(O)]                                | 176.4      | 174.8      | 175.2      | 175.5      | 175.5      | 174.9      | 175.4      |
|                | $\chi_2$ [O=C <sub>16</sub> -C-C]                       | 6.9        | 1.3        | 0.6        | 4.1        | 1.2        | 6.1        | 2.5        |
| $\mu$ (debyes) | 3.49                                                    | 3.38       | 3.48       | 3.50       | 3.49       | 3.28       | 3.42       |            |
| <b>VIIb</b>    | $E$ (hartrees)                                          | -589.93657 | -591.16054 | -590.91098 | -591.09674 | -590.92539 | -590.77972 | -590.96761 |
|                | $E_{\text{rel}}$ (kcal mol <sup>-1</sup> )              | 1.80       | 0.92       | 1.43       | 1.96       | 2.17       | 1.18       | 1.50       |
|                | ZPE (hartrees)                                          | --         | 0.178345   | 0.180608   | 0.182315   | 0.181217   | 0.173827   | 0.181208   |
|                | $E + \text{ZPE}$ (hartrees)                             | --         | -590.98219 | -590.73037 | -590.91443 | -590.74417 | -590.60589 | -590.78640 |
|                | $E_{\text{rel}} + \text{ZPE}$ (kcal mol <sup>-1</sup> ) | --         | 0.71       | 1.37       | 1.63       | 2.01       | 0.99       | 1.26       |
|                | %P ( $E_{\text{rel}} + \text{ZPE}$ )                    | --         | 6.2        | 3.2        | 2.2        | 1.5        | 5.6        | 3.5        |
|                | $\omega$ [O=C <sub>1</sub> -O-C]                        | 1.2        | 1.0        | 0.8        | 0.6        | 0.4        | 1.4        | 1.4        |
|                | $\psi$ [N-C-C=O]                                        | 22.3       | 19.4       | 15.4       | 13.1       | 10.7       | 23.2       | 19.9       |
|                | $\chi_1$ [C(O)-C-C-C(O)]                                | 178.1      | 176.5      | 176.6      | 179.5      | 180.0      | 178.5      | 178.2      |
|                | $\chi_2$ [O=C <sub>16</sub> -C-C]                       | 124.6      | 129.6      | 130.9      | 127.2      | 127.4      | 124.8      | 129.1      |
| $\mu$ (debyes) | 3.74                                                    | 3.49       | 3.45       | 3.41       | 3.25       | 3.43       | 3.49       |            |
| <b>VIIIa</b>   | $E$ (hartrees)                                          | -589.93736 | -591.15920 | -590.91024 | -591.09680 | -590.92606 | -590.77931 | -590.96773 |
|                | $E_{\text{rel}}$ (kcal mol <sup>-1</sup> )              | 1.30       | 1.76       | 1.90       | 1.92       | 1.75       | 1.44       | 1.43       |
|                | ZPE (hartrees)                                          | --         | 0.178505   | 0.180834   | 0.182699   | 0.181357   | 0.173901   | 0.181434   |
|                | $E + \text{ZPE}$ (hartrees)                             | --         | -590.98070 | -590.72940 | -590.91410 | -590.74470 | -590.60541 | -590.78630 |
|                | $E_{\text{rel}} + \text{ZPE}$ (kcal mol <sup>-1</sup> ) | --         | 1.65       | 1.98       | 1.83       | 1.68       | 1.30       | 1.32       |
|                | %P ( $E_{\text{rel}} + \text{ZPE}$ )                    | --         | 1.2        | 1.1        | 1.5        | 2.6        | 3.3        | 3.2        |
|                | $\omega$ [O=C <sub>1</sub> -O-C]                        | 1.6        | 0.1        | 0.2        | 1.1        | 1.4        | 1.1        | 1.1        |
|                | $\psi$ [N-C-C=O]                                        | 19.0       | 12.8       | 14.4       | 16.3       | 16.8       | 12.9       | 15.0       |
|                | $\chi_1$ [C(O)-C-C-C(O)]                                | 48.3       | 62.6       | 61.9       | 58.2       | 57.8       | 59.2       | 59.7       |
|                | $\chi_2$ [O=C <sub>16</sub> -C-C]                       | 163.2      | 176.0      | 176.0      | 178.5      | 179.3      | 179.2      | 177.9      |
| $\mu$ (debyes) | 1.48                                                    | 2.11       | 2.13       | 2.09       | 1.99       | 2.05       | 2.07       |            |

<sup>a</sup>Dihedral angles in degrees; <sup>b</sup> 1 au = 627.5095 kcal mol<sup>-1</sup>; (\*) The numbering of atoms is in Fig. 2.

**Table S2.** Comparison of significant NBO interactions and the corresponding energies (in kcal mol<sup>-1</sup>) for the AspOMe conformers, calculated at  $\omega$ B97X-D/aug-cc-pVTZ.

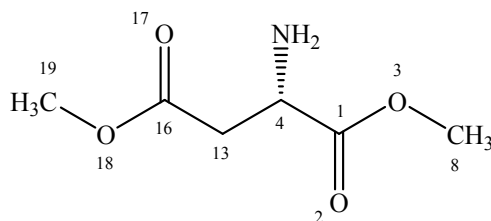

| Interaction                                        | Ia    | IIa   | IIIb            | IVb   | Vc    | VIb   | VIIb  | VIIIa |
|----------------------------------------------------|-------|-------|-----------------|-------|-------|-------|-------|-------|
| LP2(O18) $\rightarrow$ $\pi^*_{\text{C16=O17}}$    | 70.69 | 71.24 | 69.35           | 66.56 | 69.90 | 69.91 | 66.79 | 65.89 |
| LP2(O3) $\rightarrow$ $\pi^*_{\text{C1=O2}}$       | 65.27 | 63.65 | 67.29           | 68.84 | 69.78 | 69.67 | 69.11 | 66.74 |
| LP2(O2) $\rightarrow$ $\sigma^*_{\text{C1-O3}}$    | 43.71 | 43.00 | 42.41           | 42.80 | 42.98 | 43.15 | 43.10 | 43.49 |
| LP2(O17) $\rightarrow$ $\sigma^*_{\text{C16-O18}}$ | 42.38 | 41.95 | 42.24           | 43.23 | 42.70 | 42.49 | 43.89 | 45.30 |
| LP2(O2) $\rightarrow$ $\sigma^*_{\text{C1-C4}}$    | 26.31 | 25.58 | 25.58           | 25.57 | 25.45 | 25.41 | 25.70 | 26.33 |
| LP2(O17) $\rightarrow$ $\sigma^*_{\text{C13-C16}}$ | 24.97 | 24.76 | 25.31           | 25.65 | 25.33 | 25.54 | 25.18 | 24.39 |
| LP2(N) $\rightarrow$ $\sigma^*_{\text{C1-C4}}$     | 11.97 | 13.61 | -- <sup>a</sup> | 11.17 | 9.73  | 1.11  | 12.05 | 12.08 |
| LP2(O18) $\rightarrow$ $\sigma^*_{\text{C16-O17}}$ | 10.30 | 10.40 | 10.15           | 10.00 | 10.25 | 10.14 | 9.77  | 9.33  |
| LP2(O3) $\rightarrow$ $\sigma^*_{\text{C1-O2}}$    | 9.94  | 10.04 | 9.90            | 10.37 | 10.77 | 10.50 | 10.42 | 10.08 |
| LP2(O17) $\rightarrow$ $\sigma^*_{\text{N5-H7}}$   | 0.50  | 0.72  | --              | --    | --    | --    | --    | --    |
| LP2(O2) $\rightarrow$ $\sigma^*_{\text{N5-H7}}$    | --    | --    | 0.85            | --    | --    | --    | --    | --    |

<sup>a</sup> Hyperconjugation energy smaller than 0.5 kcal mol<sup>-1</sup>.

**Table S3.** Comparison between calculated and experimental  ${}^3J_{\text{HaHb1}}$  coupling constant for AspOMe compound.

|                                 | Benzene           | Chloroform | Dichloromethane | Acetone | Acetonitrile | DMSO |
|---------------------------------|-------------------|------------|-----------------|---------|--------------|------|
| <b>Ia</b>                       | 0.92 <sup>a</sup> | 0.99       | 1.25            | 1.05    | 1.02         | 1.02 |
| <b>IIa</b>                      | 0.77              | 0.67       | 0.60            | 0.56    | 0.53         | 0.54 |
| <b>IIIb</b>                     | 0.24              | 0.21       | 0.17            | 0.16    | 0.16         | 0.16 |
| <b>IVb</b>                      | 0.28              | 0.33       | 0.29            | 0.33    | 0.34         | 0.34 |
| <b>Vc</b>                       | 1.05              | 1.01       | 0.90            | 0.97    | 0.98         | 0.98 |
| <b>VIb</b>                      | 0.13              | 0.12       | 0.10            | 0.15    | 0.16         | 0.16 |
| <b>VIIb</b>                     | 0.21              | 0.24       | 0.24            | 0.28    | 0.29         | 0.30 |
| <b>VIIIa</b>                    | 0.20              | 0.23       | 0.23            | 0.28    | 0.30         | 0.30 |
| <b>Theoretical<sup>b</sup></b>  | 3.8               | 3.8        | 3.8             | 3.8     | 3.8          | 3.8  |
| <b>Experimental<sup>c</sup></b> | 4.2               | 4.2        | 4.1             | 4.8     | 4.8          | 6.3  |

<sup>a</sup> Conformational contributions values ( $\eta_i \times {}^3J_{\text{HaHb1},i}$ ) for the observed  ${}^3J_{\text{HaHb1,obs}}$  coupling constant, calculated at the  $\omega$ B97X-D/EPR-III level of theory.

<sup>b</sup> Predicted  ${}^3J_{\text{HaHb1}}$  coupling constant.

<sup>c</sup> Experimental  ${}^3J_{\text{HaHb1}}$  coupling constant.

**Table S4.** Comparison between calculated and experimental  ${}^3J_{\text{HaHb2}}$  coupling constant for AspOMe compound.

|                                 | Benzene | Chloroform | Dichloromethane | Acetone | Acetonitrile | DMSO |
|---------------------------------|---------|------------|-----------------|---------|--------------|------|
| <b>Ia</b>                       | 1.26    | 1.34       | 1.7             | 1.46    | 1.42         | 1.42 |
| <b>IIa</b>                      | 0.88    | 0.76       | 0.68            | 0.65    | 0.63         | 0.59 |
| <b>IIIb</b>                     | 1.11    | 0.98       | 0.79            | 0.73    | 0.72         | 0.72 |
| <b>IVb</b>                      | 1.52    | 1.71       | 1.48            | 1.68    | 1.71         | 1.74 |
| <b>Vc</b>                       | 0.3     | 0.29       | 0.26            | 0.28    | 0.29         | 0.29 |
| <b>VIb</b>                      | 0.69    | 0.63       | 0.57            | 0.79    | 0.86         | 0.85 |
| <b>VIIb</b>                     | 0.75    | 0.87       | 0.86            | 1.01    | 1.06         | 1.08 |
| <b>VIIIa</b>                    | 0.25    | 0.28       | 0.28            | 0.33    | 0.35         | 0.35 |
| <b>Theoretical<sup>b</sup></b>  | 6.8     | 6.9        | 6.6             | 6.9     | 7.0          | 7.0  |
| <b>Experimental<sup>c</sup></b> | 6.0     | 5.6        | 5.8             | 5.2     | 5.7          | 6.3  |

<sup>a</sup> Conformational contributions values ( $\eta_i \times {}^3J_{\text{HaHb2},i}$ ) for the observed  ${}^3J_{\text{HaHb2,obs}}$  coupling constant, calculated at the  $\omega$ B97X-D/EPR-III level of theory.

<sup>b</sup> Predicted  ${}^3J_{\text{HaHb2}}$  coupling constant.

<sup>c</sup> Experimental  ${}^3J_{\text{HaHb2}}$  coupling constant.

**Table S5.** Relative total energy of the system ( $E_{\text{rel,Tot}}$ )<sup>a</sup>, relative energy of the steric ( $E_{\text{rel,Lewis}}$ ) and hyperconjugative ( $E_{\text{rel,Hyper}}$ ) interactions for the AspOMe conformers, taking into account the solvent effects (IEF-PCM), calculated at  $\omega$ B97X-D/aug-cc-pVTZ level of theory.

| Conformer    | $E_{\text{rel,Tot}}$ |                   |      | $E_{\text{rel,Lewis}}$ |                   |      | $E_{\text{rel,Hyper}}$ |                   |      |
|--------------|----------------------|-------------------|------|------------------------|-------------------|------|------------------------|-------------------|------|
|              | Isolated             | CHCl <sub>3</sub> | DMSO | Isolated               | CHCl <sub>3</sub> | DMSO | Isolated               | CHCl <sub>3</sub> | DMSO |
| <b>Ia</b>    | 0.00                 | 0.00              | 0.00 | 5.67                   | 6.58              | 7.12 | 7.12                   | 7.48              | 7.80 |
| <b>IIa</b>   | 0.15                 | 0.41              | 0.56 | 6.94                   | 7.82              | 8.75 | 8.25                   | 8.31              | 8.87 |
| <b>IIIb</b>  | 0.63                 | 0.97              | 1.11 | 0.27                   | 0.64              | 0.61 | 1.10                   | 0.57              | 0.19 |
| <b>IVb</b>   | 1.10                 | 0.71              | 0.55 | 0.00                   | 0.46              | 0.59 | 0.36                   | 0.65              | 0.72 |
| <b>Vc</b>    | 0.93                 | 0.79              | 0.79 | 4.60                   | 4.87              | 5.23 | 5.13                   | 4.97              | 5.12 |
| <b>VIb</b>   | 1.37                 | 1.22              | 1.08 | 3.59                   | 2.14              | 1.21 | 3.67                   | 1.82              | 0.81 |
| <b>VIIb</b>  | 1.50                 | 0.90              | 0.68 | 0.05                   | 0.00              | 0.00 | 0.00                   | 0.00              | 0.00 |
| <b>VIIIa</b> | 1.42                 | 0.95              | 0.88 | 7.24                   | 8.00              | 8.60 | 7.27                   | 7.95              | 8.40 |

<sup>a</sup> Relative energies in kcal mol<sup>-1</sup>.

**Table S6.** Relative total energy of the system ( $E_{\text{rel,Tot}}$ )<sup>a</sup>, relative energy of the steric ( $E_{\text{rel,Lewis}}$ ) and hyperconjugative ( $E_{\text{rel,Hyper}}$ ) interactions for the AcAspOMe conformers, taking into account the solvent effects (IEF-PCM), calculated at  $\omega$ B97X-D/aug-cc-pVTZ.

| Conformer                | $E_{\text{rel,Tot}}$ |                   |      | $E_{\text{rel,Lewis}}$ |                   |       | $E_{\text{rel,Hyper}}$ |                   |       |
|--------------------------|----------------------|-------------------|------|------------------------|-------------------|-------|------------------------|-------------------|-------|
|                          | Isolated             | CHCl <sub>3</sub> | DMSO | Isolated               | CHCl <sub>3</sub> | DMSO  | Isolated               | CHCl <sub>3</sub> | DMSO  |
| <b><i>trans</i>-Ia</b>   | 0.00                 | 0.00              | 0.00 | 16.18                  | 13.14             | 11.79 | 20.00                  | 15.56             | 13.07 |
| <b><i>trans</i>-IIIb</b> | 3.81                 | 2.43              | 1.29 | 0.00                   | 0.00              | 0.00  | 0.00                   | 0.00              | 0.00  |
| <b><i>trans</i>-Vc</b>   | 3.59                 | 2.28              | 1.36 | 16.25                  | 15.64             | 14.69 | 16.47                  | 15.79             | 14.62 |

<sup>a</sup> Relative energies in kcal mol<sup>-1</sup>.
